# Supplementary material for: Epstein–Barr virus tegument protein BGLF2 in exosomes released from virus-producing cells facilitates de novo infection
Source: PubMed Central journal article supplement (PMC9210680; doi:10.1186/s12964-022-00902-7), 2022-06-21

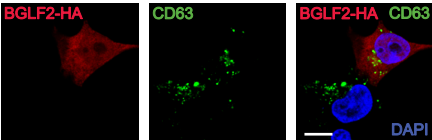

Supplement: 12964_2022_902_MOESM2_ESM.pdf [file 12964_2022_902_MOESM2_ESM.pdf]
